# Supplementary material for: The circulating exosomal microRNAs related to albuminuria in patients with diabetic nephropathy
Source: Springer Nature journal article supplement (doi:10.1186/s12967-019-1983-3), 2019-07-22
Supplement: MOESM1 [file 16970508]

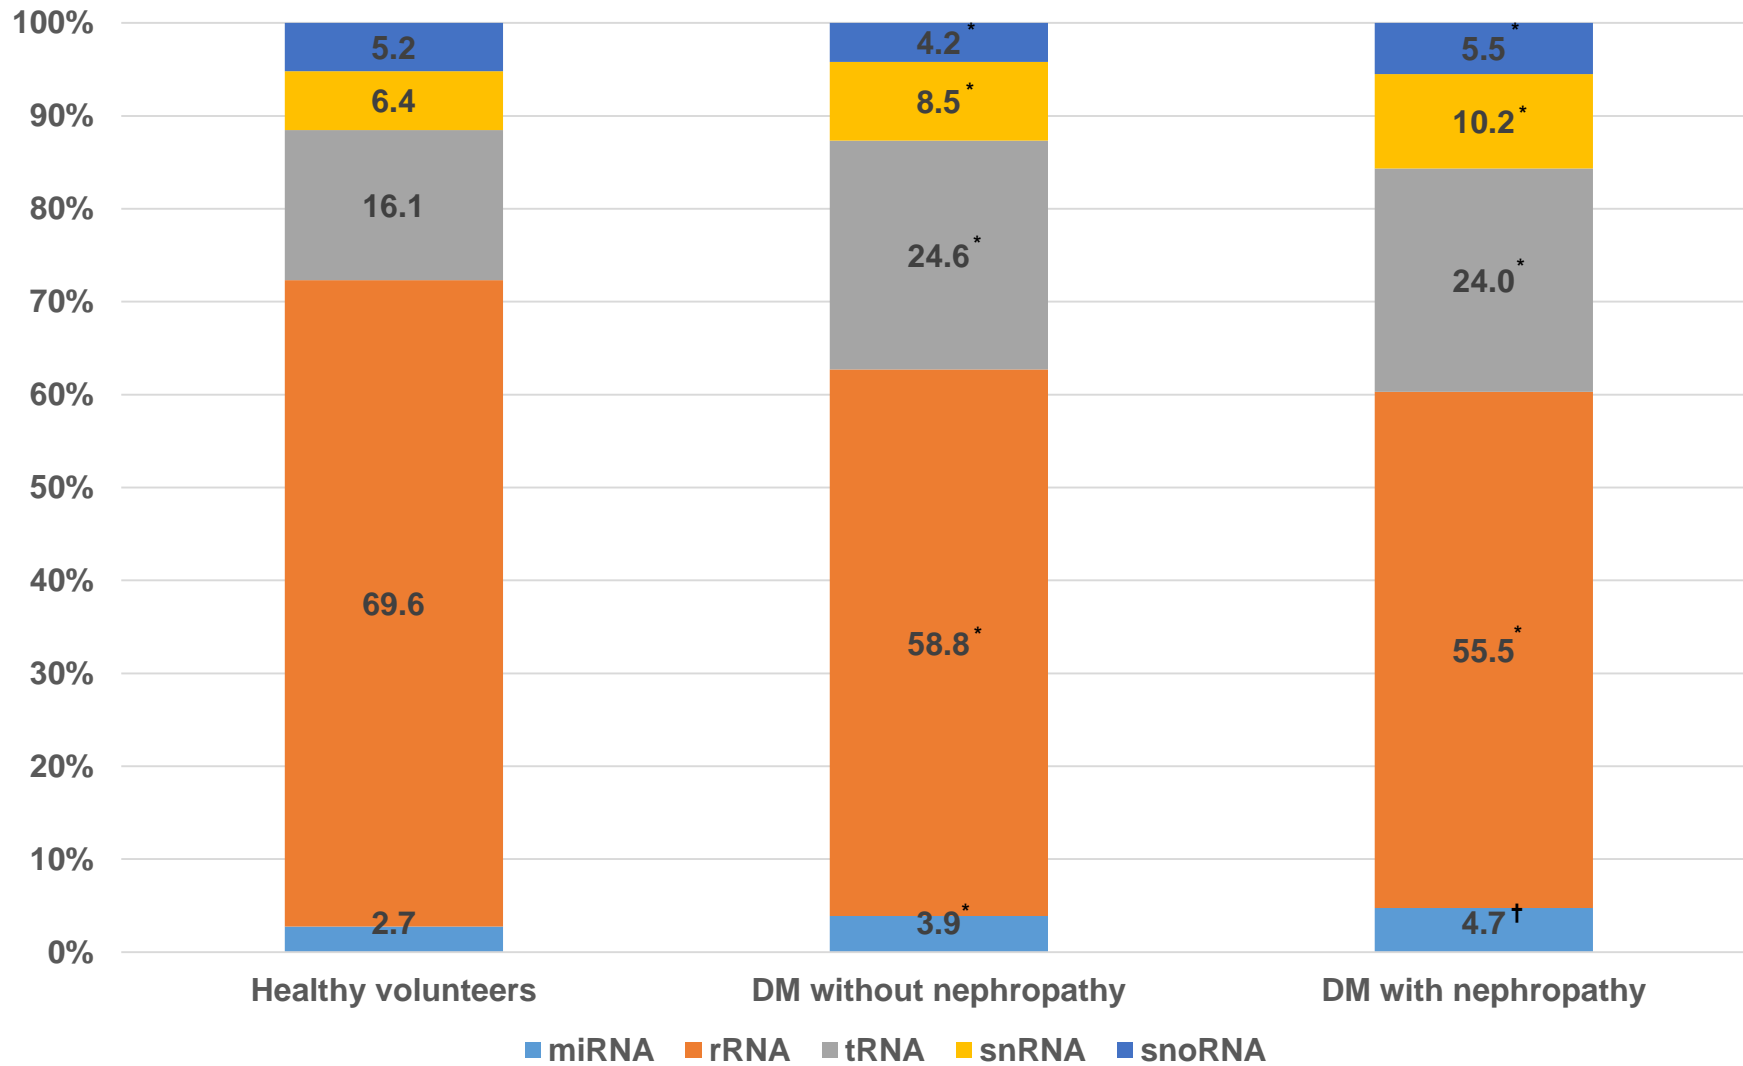

**Figure S1. Small RNA composition changes in circulating exosomes by RNA sequencing.  
\*P<0.05 vs. healthy volunteers, †P<0.05 vs. DM without nephropathy**

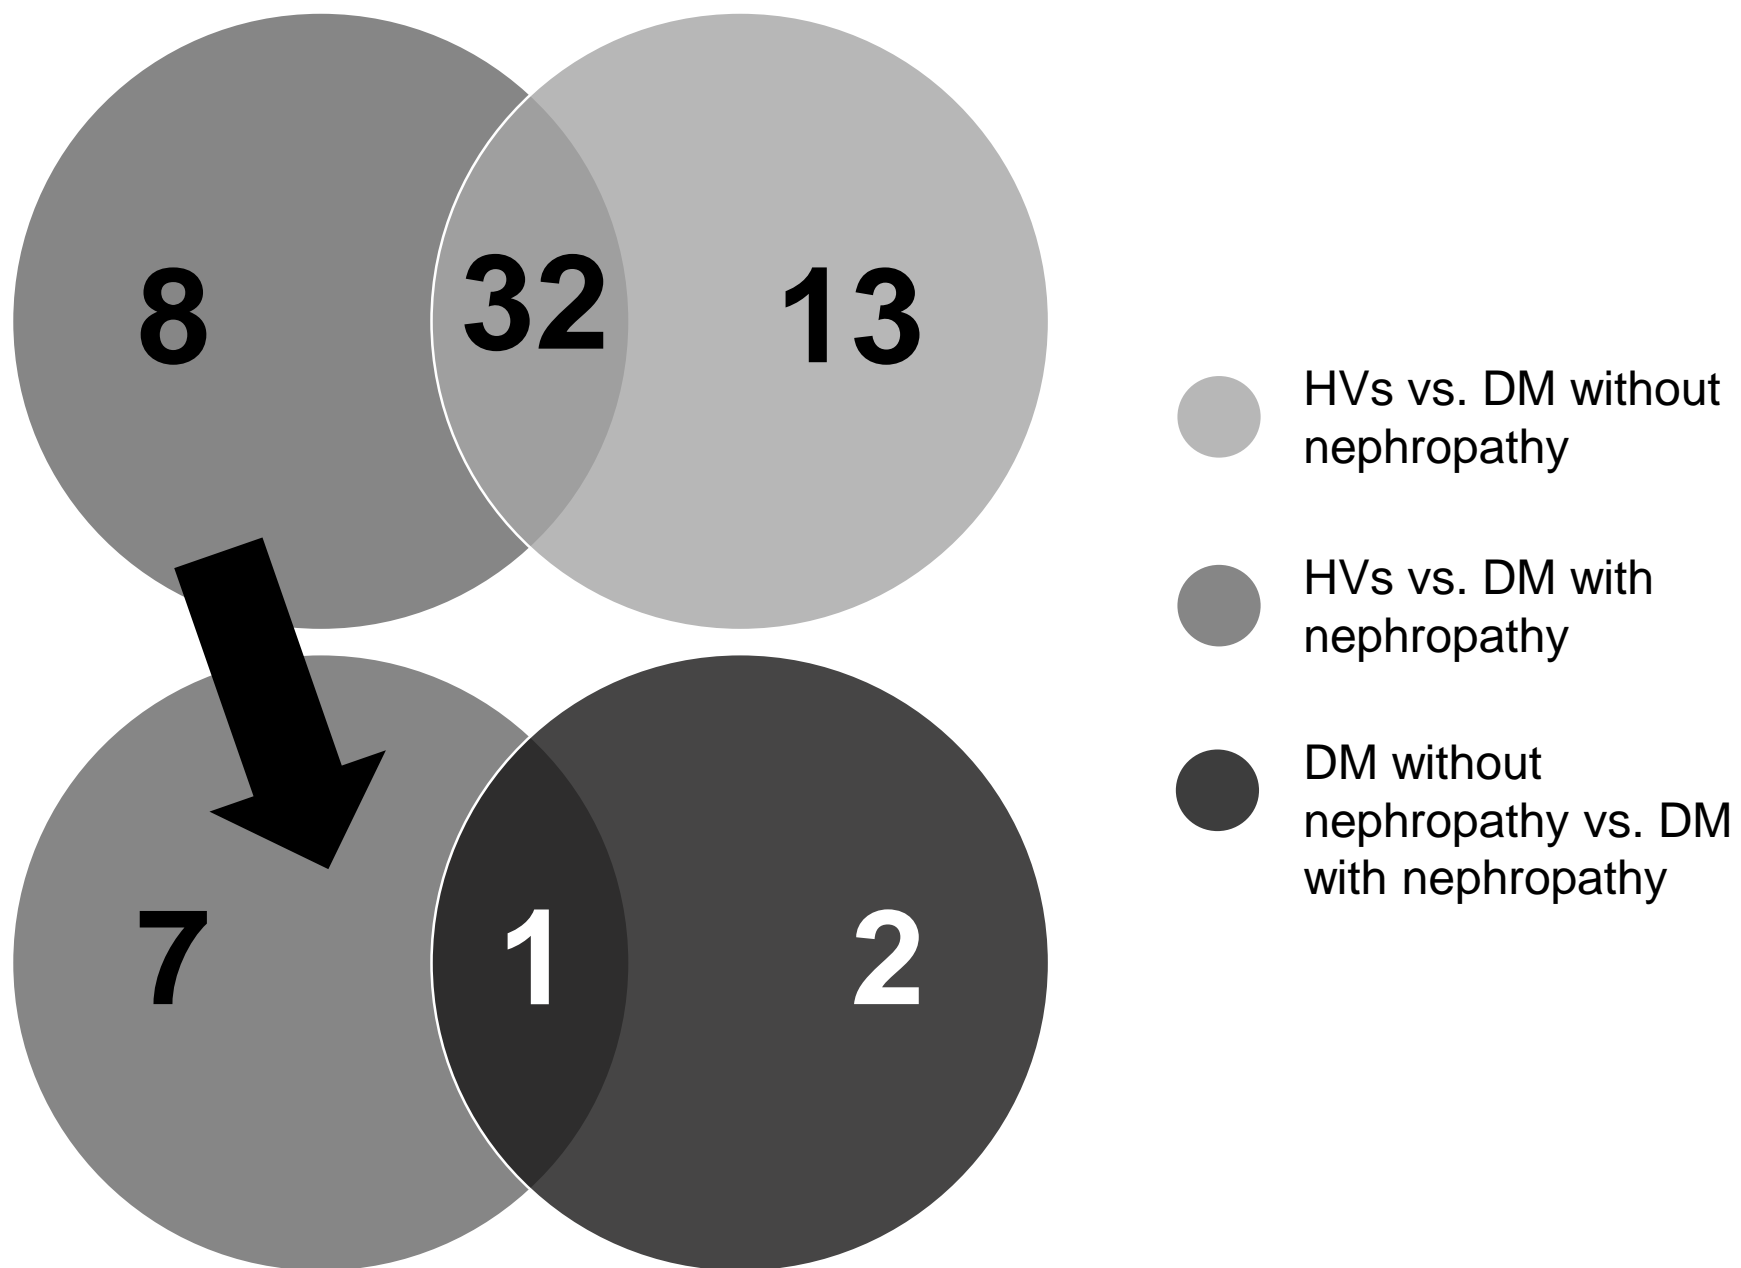

**Figure S2. Selection process of miRNAs uniquely up-regulated in patients with diabetes mellitus (DM) nephropathy**
